# Supplementary material for: Studies of Bis-(Sodium-Sulfopropyl)-Disulfide and 3-Mercapto-1-Propanesulfonate on/into the Copper Electrodeposited Layer by Time-of-Flight Secondary-Ion Mass Spectrometry
Source: MDPI journal article supplement (doi:10.3390/molecules27238116), 2022-11-22
Supplement: s1 [file s1]

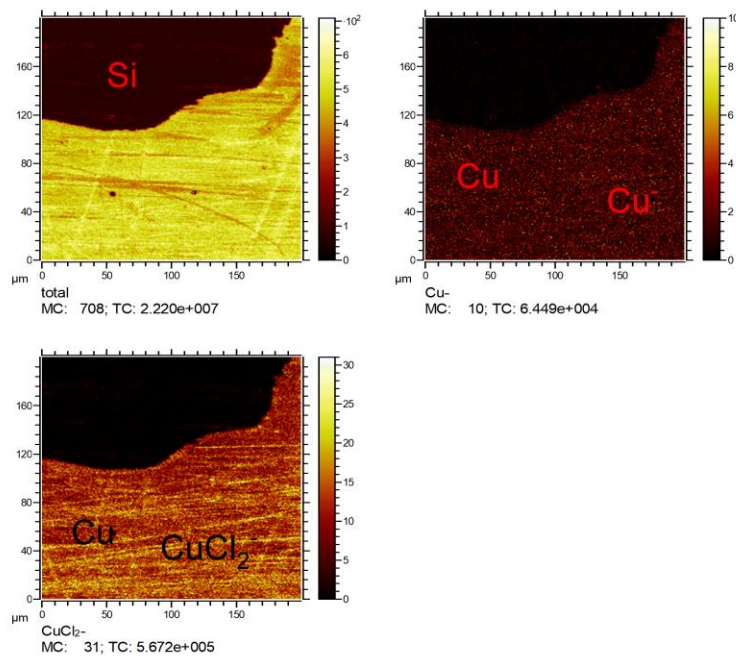

Figure S1. Distribution of Cu- and CuCl<sub>2</sub>- ions on the copper layer deposited on the silicon wafer by magnetron sputtering. Inspection area: 200 μm x 200 μm. Si and Cu layers are clearly visible.

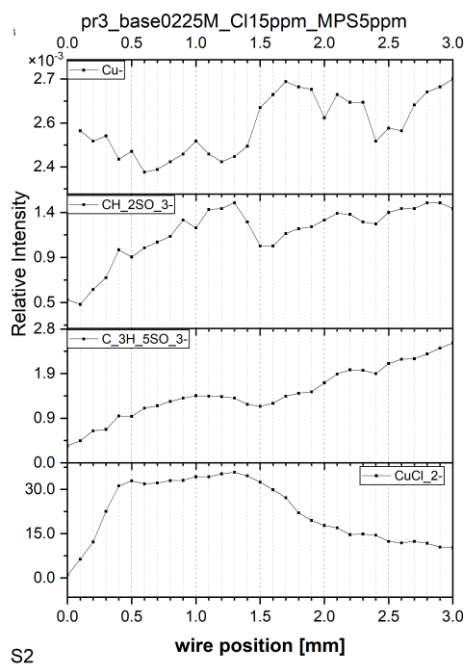

Figure S2. Distribution of intensity of the fragments: Cu<sup>-</sup>, CH<sub>2</sub>SO<sub>3</sub><sup>-</sup>, C<sub>3</sub>H<sub>5</sub>SO<sub>3</sub><sup>-</sup> and CuCl<sub>2</sub><sup>-</sup> along the wire for sample deposited from the base solution contained Cl(15ppm) and 5 ppm of MPS

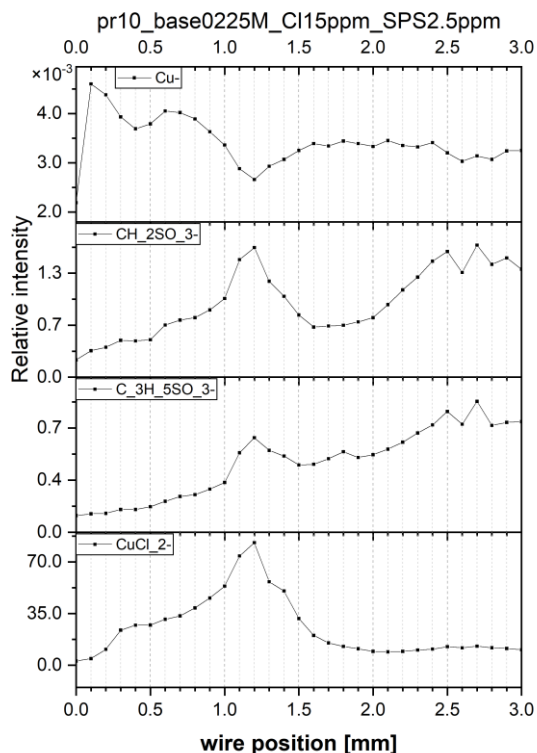

Figure S3. Distribution of intensity of the fragments: Cu<sup>-</sup>, CH<sub>2</sub>SO<sub>3</sub><sup>-</sup>, C<sub>3</sub>H<sub>5</sub>SO<sub>3</sub><sup>-</sup> and CuCl<sub>2</sub><sup>-</sup> along the wire for sample deposited from the base solution contained Cl(15ppm) and 2.5 ppm of SPS

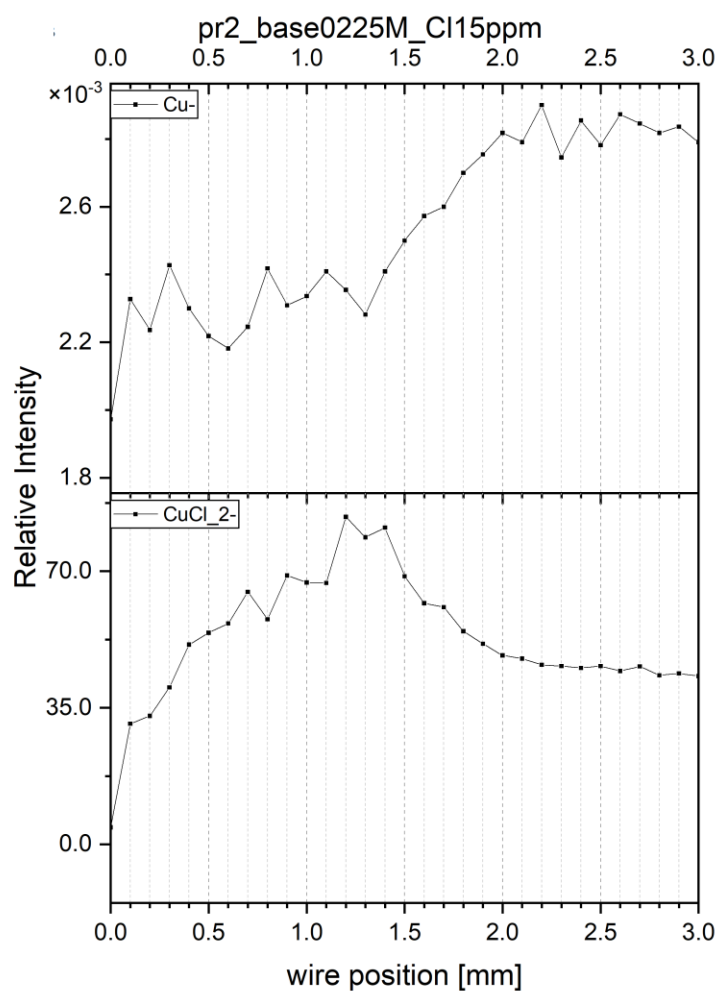

Figure S4. Distribution of intensity of the fragments: Cu<sup>-</sup> and CuCl<sub>2</sub><sup>-</sup> along the wire for sample deposited from the base solution contained Cl<sup>-</sup> ions (15ppm)
